# Supplementary material
Source: Research Square preprint supplement (doi:10.21203/rs.3.rs-9707641/v1)
Supplement: Supplementary file 1 [file a118db3c17a6cc780a585316.docx]

**Appendix: Complete Tables**

**Appendix Table 1. Characteristics of Included Studies**

| # | First Author, Year | Study Design | Agent | Sample Size | Dosing Schedules & De‑escalation Criteria |
| --- | --- | --- | --- | --- | --- |
| 1 | Garfall A / Popat R, 2024 [20] | Phase 1/2 single arm (MajesTEC‑1) | Teclistamab | 165 | 1.5 mg/kg SC QW → Q2W if ≥PR after ≥4 cycles (phase 1) or ≥CR for ≥6 mo (phase 2). 37/38 on treatment switched. |
| 2 | Nooka AK, 2024 [25] | Pre‑specified secondary analysis | Teclistamab | 165 | Same as Study 1. |
| 3 | Stork M, 2025 [23] | Retrospective multicentre | Teclistamab | 73 | Weekly (n≈55) vs. early de‑escalation (n≈18; within 1 month). |
| 4 | Snyder J, 2025 [17] | Retrospective multicentre | Teclistamab | 88 | Continuous QW (n=72) vs. fixed duration (stopped after ≥VGPR; n=16). |
| 5 | Ishida T, 2024 [42] | Phase 1/2 single arm (Japanese) | Teclistamab | 26 | 1.5 mg/kg SC QW; Q2W after sustained response ≥6 mo. |
| 6 | Bahlis NJ, 2025 [30] | Post‑hoc PRO analysis (MagnetisMM‑3) | Elranatamab | 83 | QW x 24 wks → Q2W. PRO data post switch. |
| 7 | Prince HM / Pfizer, 2025 [21] | Post‑hoc regulatory analysis | Elranatamab | 28 (Q4W) | QW→Q2W x ≥6 cycles, then Q4W. |
| 8 | Mohty M, 2023 [22] | Phase 2 single arm (EHA abstract) | Elranatamab | 123 | QW→Q2W after 6 cycles. |
| 9 | Jakubowiak 2022 [18] | Phase 1 dose escalation | Elranatamab | 55 | SC 80–1000 µg/kg QW or Q2W. RP2D: 76 mg QW. |
| 10 | Chari A, 2023 [19] | Phase 1/2 de‑escalation cohorts | Talquetamab | 24 | Cohort A: 0.8→0.4 mg/kg Q2W after PR; Cohort B: 0.8 mg/kg Q2W→Q4W after PR. |
| 11 | Schinke C, 2025 [24] | Phase 1/2 primary efficacy | Talquetamab | 375 total | QW: 0.4 mg/kg (n=143); Q2W: 0.8 mg/kg (n=154); prior TCR (n=78). |
| 12 | Al Hadidi S, 2025 [26] | Retrospective multicentre | Talquetamab | 114 | Mixed; real‑world dosing patterns. |
| 13 | Chunara F, 2025 [27] | Retrospective claims database | Teclistamab / Talq | 609 | Real‑world dosing intervals analysed. |
| 14 | Elmeliegy M, 2025 [28] | In silico QSP model | Elranatamab | – | Simulated QW, Q2W, Q4W. |

**Appendix Table 2. Patient Characteristics Across Studies**

| Study # | Agent | Median Age (y) | Male (%) | High‑risk Cytogenetics (%) | Median Prior Lines | Triple‑class Refractory (%) |
| --- | --- | --- | --- | --- | --- | --- |
| 1 | Teclistamab | 64 (33‑84) | 58.2 | 27 | 5 | 78 |
| 2 | Teclistamab | 64 | 58.2 | NR | 5 | 78 |
| 3 | Teclistamab | 67 | NR | NR | NR | 100 (68.5% penta) |
| 4 | Teclistamab | NR | NR | NR | NR | NR |
| 5 | Teclistamab | 69 (34‑82) | 54 | NR | 5 | 100 (triple‑class exposed) |
| 6 | Elranatamab | 66 (BCMA naïve) | 55 | NR | 5 | 100 |
| 7 | Elranatamab | NR | NR | NR | NR | NR |
| 8 | Elranatamab | 66 | 56 | 25 | 5 | 100 |
| 9 | Elranatamab | 64 | 53 | 29 | 6 | 91 |
| 10 | Talquetamab | NR | NR | NR | NR | NR |
| 11 (QW) | Talquetamab | 64 | 55 | 24 | 5 | 74 (triple‑class exposed) |
| 11 (Q2W) | Talquetamab | 64 | 56 | 24 | 6 | 79 (triple‑class exposed) |
| 12 | Talquetamab | 67 | 51 | NR | 6 | 100 |
| 13 | Teclistamab | 70 (31‑90) | NR | NR | NR | NR |
| 13 | Talquetamab | 66 (34‑90) | NR | NR | NR | NR |

NR = Not reported; Triple‑class exposed = received PI/IMiD/anti‑CD38, refractoriness not always specified.

**Appendix Table 3. Efficacy Outcomes by Study and Dosing Schedule**

| Study (agent) | Dosing schedule | ORR (%) | ≥CR (%) | Median PFS (mo) | Median DOR (mo) | MRD negativity (%) | Response Maintenance post switch |
| --- | --- | --- | --- | --- | --- | --- | --- |
| 1 (Teclistamab) [20] | QW→Q2W | 63.0 | 46.1 | 11.4 | 24.0 | 85.7 (10⁻⁵) | 100% (37/37) |
| 3 (Teclistamab) [23] | Weekly | NR | NR | 9.1 | NR | NR | – |
| 3 (Teclistamab) [23] | Early de‑escalation | NR | NR | 11.3 | NR | NR | – |
| 4 (Teclistamab) [17] | Continuous QW | NR | 44 | 16 | NR | NR | – |
| 4 (Teclistamab) [17] | Fixed duration | NR | 69 | 13 | NR | NR | – |
| 5 (Teclistamab) [42] | QW→Q2W | 76.9 | 65.4 | NR | NR (not reached) | NR | – |
| 7 (Elranatamab) [21] | QW→Q2W→Q4W | – | – | – | – | – | 92.6% (25/27) at 6 mo |
| 8 (Elranatamab) [22] | QW→Q2W | – | – | – | – | – | 80.4% maintained/improved |
| 9 (Elranatamab) [18] | QW (RP2D) | 64 | 38 | NR | NR | 100% (in ≥CR) | – |
| 10 (Talquetamab) [19] | Q2W→ reduced dose/freq | – | – | – | – | – | “Most deepened/maintained” |
| 11 (Talquetamab) [24] | QW (0.4) | 74 | ~25 | 7.5 | 9.5 | NR | – |
| 11 (Talquetamab) [24] | Q2W (0.8) | 71 | ~24 | 11.2 | 17.5 | NR | – |
| 12 (Talquetamab) [26] | Real‑world mixed | 73 | 26 | 10 | NR | NR | – |

**Appendix Table 4. Infection‑Related Toxicity by Study**

| Study | Agent / Schedule | Any‑grade Infection (%) | Grade ≥3 Infection (%) | Key Details |
| --- | --- | --- | --- | --- |
| 1/2 | Teclistamab overall | 79 | 55 | Median time to first G3‑5: 4.2 mo; COVID‑19 caused 18/22 deaths |
| 3 | Teclistamab weekly vs. early de‑escalation | “similar” | “similar” | Exact rates NR |
| 4 | Teclistamab fixed duration | 75 | 69 | – |
| 8 | Elranatamab QW phase | – | 58.6¹ | G3/4 AEs; 10% absolute reduction after Q2W |
| 8 | Elranatamab Q2W phase | – | 46.6¹ | – |
| 7 | Elranatamab QW/Q2W phase | – | 17.9² | Grade 3‑4 infections (denominator unclear) |
| 7 | Elranatamab Q4W phase | – | 10.7² | – |
| 11 | Talquetamab QW (0.4) | 61 | 23 | – |
| 11 | Talquetamab Q2W (0.8) | 71 | 21 | – |
| 12 | Talquetamab real‑world | Cumulative 3‑mo incidence 14% | 18 | 59% viral, 41% bacterial; 61% IVIG use |

¹ Includes all grade 3/4 adverse events, not solely infections.
² Grade 3‑4 infections specifically.

**Appendix Table 5. Risk of Bias Summary**

| Study # | Design | Tool | Overall Rating / Score | Major Limitation |
| --- | --- | --- | --- | --- |
| 1 | Phase 1/2 single arm | ROBINS‑I | Moderate | No comparator; non‑random switch |
| 2 | Secondary analysis | ROBINS‑I | Moderate | Single‑arm parent study |
| 3 | Retrospective cohort | NOS | 4/9 stars | Inadequate comparability control, short follow‑up |
| 4 | Retrospective cohort | NOS | 5/9 stars | Partial comparability, short follow‑up |
| 5 | Phase 1/2 single arm | ROBINS‑I | Moderate | No comparator |
| 6 | Post‑hoc PRO | ROBINS‑I | Moderate | Single arm, selected subset |
| 7 | Press release | – | Not assessable | – |
| 8 | Phase 2 (abstract) | ROBINS‑I | Moderate | Single arm, non‑random switch |
| 9 | Phase 1 | ROBINS‑I | Moderate | No comparator |
| 10 | Phase 1/2 cohorts | ROBINS‑I | Moderate | Non‑random cohort assignment |
| 11 | Phase 1/2 primary | ROBINS‑I | Moderate | Non‑random dosing schedules |
| 12 | Retrospective cohort | NOS | 6/9 stars | No concurrent comparator |
| 13 | Retrospective database | NOS | 3/9 stars | Claims data limitations, minimal confounding control |
| 14 | In silico model | – | Not applicable | Not a clinical study |
